# Supplementary material
Source: publisher site journal article supplement (https://www.dovepress.com/article/358150)
Supplement: Supplementary file 1 [file get_supplementary_file.php]

**Supplementary Material 1**

Comparison of the scoring rate in each cognitive domain assessed with MoCA between the PD-NC and PD-CI groups.

| Domain ‡ | PD-NC | PD-CI * |
| --- | --- | --- |
| Visuospatial/Executive (5) | 76.0% | 52.8% (-23.2%) |
| Naming (3) | 90.7% | 74.3% (-16.3%) |
| Attention (6) | 92.3% | 76.5% (-15.8%) |
| Language (3) | 75.7% | 54.7% (-21.0%) |
| Abstraction (2) | 70.5% | 47.5% (-23.0%) |
| Memory (5) | 60.4% | 24.8% (-35.6%) |
| Orientation (2) | 97.8% | 89.5% (-8.3%) |

**Notes:**

‡ Numbers in the brackets are the total points for each domain.

* Percentages in the brackets are difference values of the two groups.

**Abbreviations:**

MoCA, Montreal Cognitive Assessment; PD, Parkinson’s Disease; PD-NC, Parkinson’s Disease with Normal Cognition; PD-CI, Parkinson’s Disease with Cognitive Impairment.
